# Supplementary material for: In situ formation of Co3O4 nanocrystals embedded in laser-induced graphene foam for high-energy flexible micro-supercapacitors
Source: Royal Society of Chemistry journal article supplement (doi:10.1039/d1dt03848f), 2022-01-01
Supplement: d1dt03848f1.pdf [file d1dt03848f1.pdf]

*Supporting Information*

***In-situ* Formation of Co<sub>3</sub>O<sub>4</sub> Nanocrystals Embedded in Laser-Induced Graphene Foam for High-Energy Flexible Micro-supercapacitor**

Xiaohong Ding<sup>a,c</sup>, Ruilai Liu<sup>a</sup>, Jingyun Zhao<sup>a</sup>, Jiapeng Hu<sup>a</sup>, Jinjin Wu<sup>b</sup>, Cheng Zhang<sup>b\*</sup>, Jing Lin<sup>d\*</sup>

<sup>a</sup>*Fujian Provincial Key Laboratory of Eco-Industrial Green Technology, College of Ecological and Resources Engineering, Wuyi University, Wuyishan, Fujian, 354300, P. R. China.*

<sup>b</sup>*Fujian Key Laboratory of Functional Marine Sensing Materials, College of Material and Chemical Engineering, Minjiang University, Fuzhou, 350108, P. R. China.*

<sup>c</sup>*Department of Engineering Science and Mechanics, Materials Research Institute, Penn State University, University Park, Pennsylvania 16802, USA*

<sup>d</sup>*School of Chemistry and Chemical Engineering, Guangzhou University, Guangzhou, 510006, P. R. China.*

\*To whom correspondences should be addressed. E-mails: [zhangcheng@mju.edu.cn](mailto:zhangcheng@mju.edu.cn) (Z. Cheng) ; [linjin00112043@126.com](mailto:linjin00112043@126.com)/[linjing@gzhu.edu.cn](mailto:linjing@gzhu.edu.cn) (J. Lin).

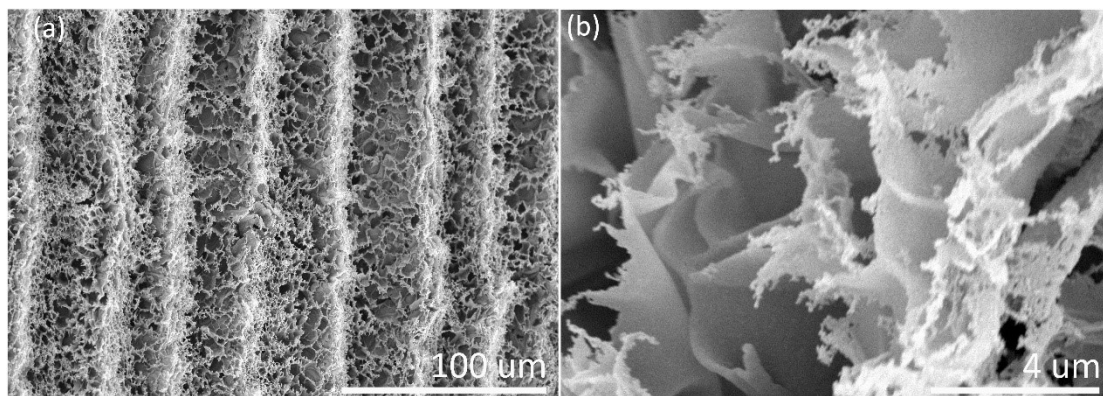

Figure S1: Low- and high-magnification SEM images of the  $\text{Co}_3\text{O}_4@\text{LIG}$  nanocomposites with low mass loading of  $\text{Co}_3\text{O}_4$  particles.

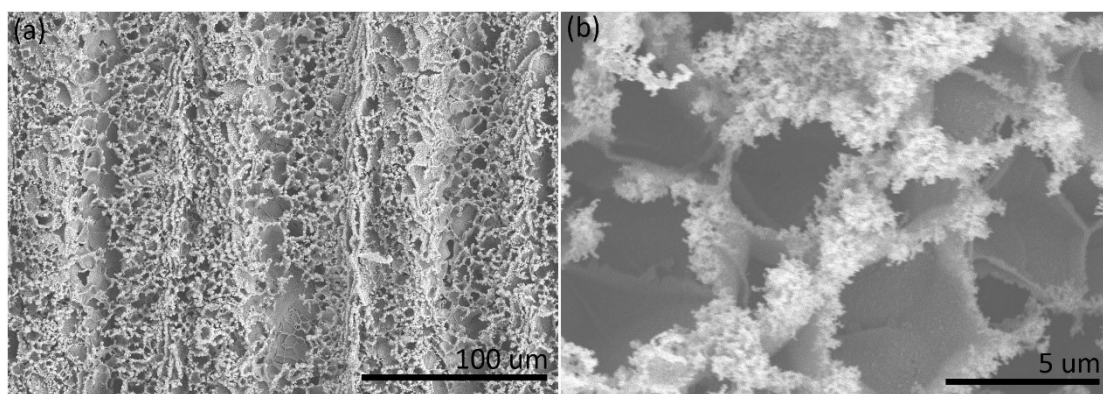

Figure S2: Low- and high-magnification SEM images of the  $\text{Co}_3\text{O}_4@\text{LIG}$  nanocomposites with high mass loading of  $\text{Co}_3\text{O}_4$  particles.

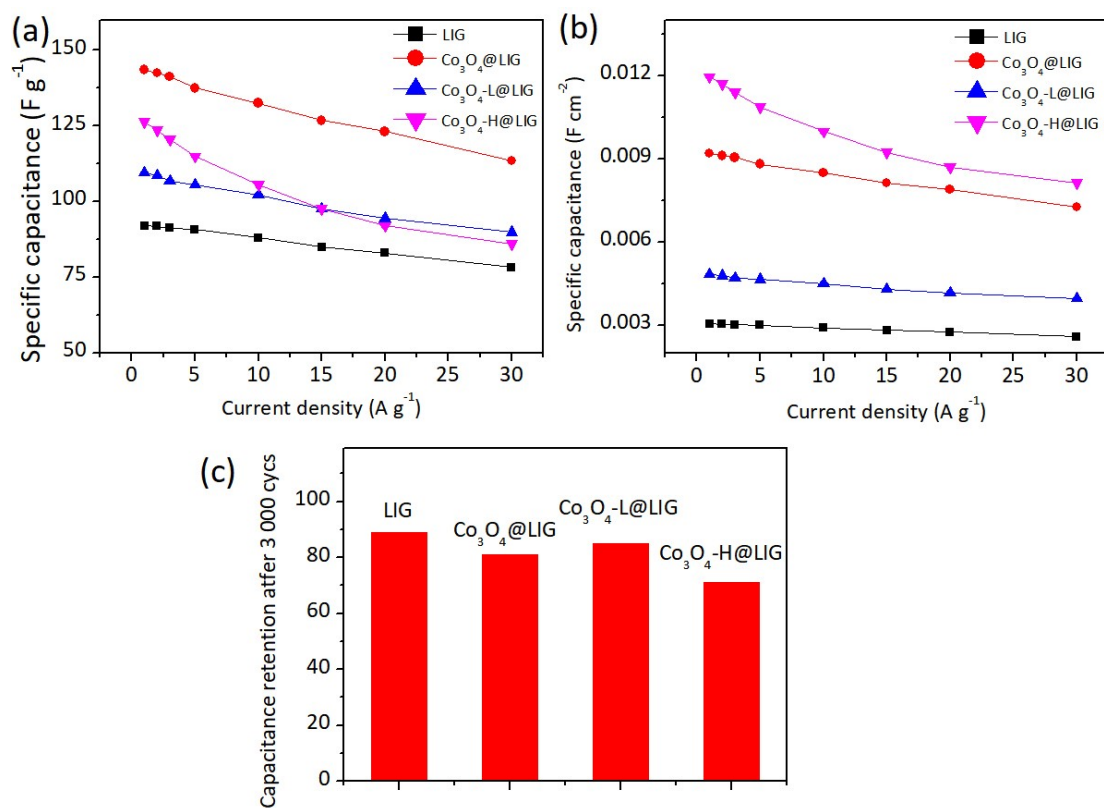

Figure S3: The specific gravimetric capacitance (a) and areal capacitance (b) of MSCs based on LIG,  $Co_3O_4@LIG$ ,  $Co_3O_4-L@LIG$  and  $Co_3O_4-M@LIG$  hybrid electrodes at current densities of 1-30  $A g^{-1}$ ; (c) The capacity retention of LIG-MSC,  $Co_3O_4@LIG$ -MSC,  $Co_3O_4-L@LIG$ -MSC and  $Co_3O_4-M@LIG$ -MSC after 3 000 cycles at constant current density of 2  $A g^{-1}$ .
